# Supplementary material for: DNA/RNA heteroduplex oligonucleotide for highly efficient gene silencing
Source: PubMed Central journal article supplement (PMC4918363; doi:10.1038/ncomms8969), 2015-08-10
Supplement: ncomms8969-s1.pdf [file ncomms8969-s1.pdf]

## Supplementary Figures

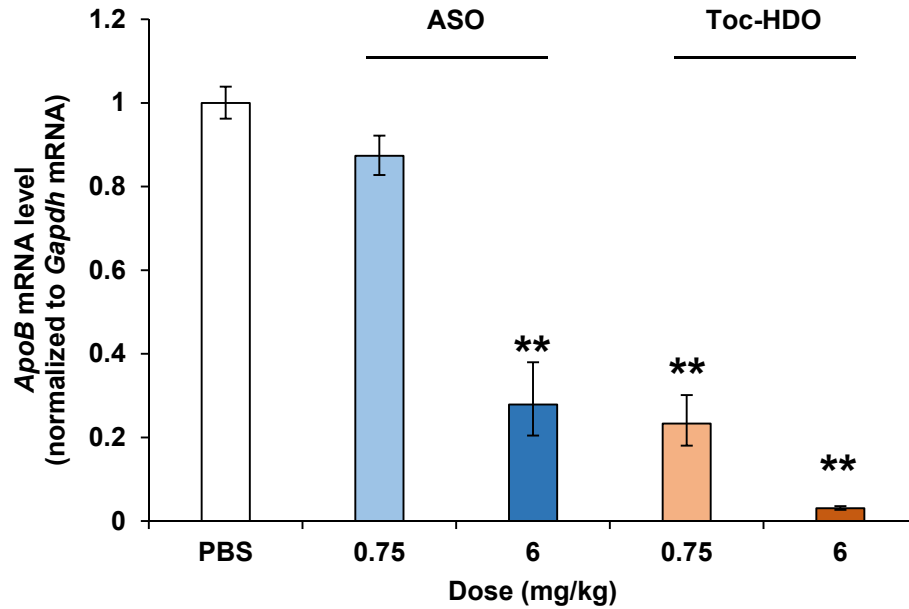

### Supplementary Figure 1. The efficacy of another Toc-HDO targeting *ApoB* mRNA.

qRT-PCR analyses of *ApoB* mRNA levels in liver 3 d after injection of 0.75 and 6 mg/kg another sequence of Toc-HDO targeting *ApoB* mRNA. Data are expressed as mean values  $\pm$  s.e.m. ( $n = 3$ , \*\*  $P < 0.01$  versus PBS). Data are representative of at least three independent experiments each.  $P$  values were calculated from Student's two-tailed  $t$ -test.

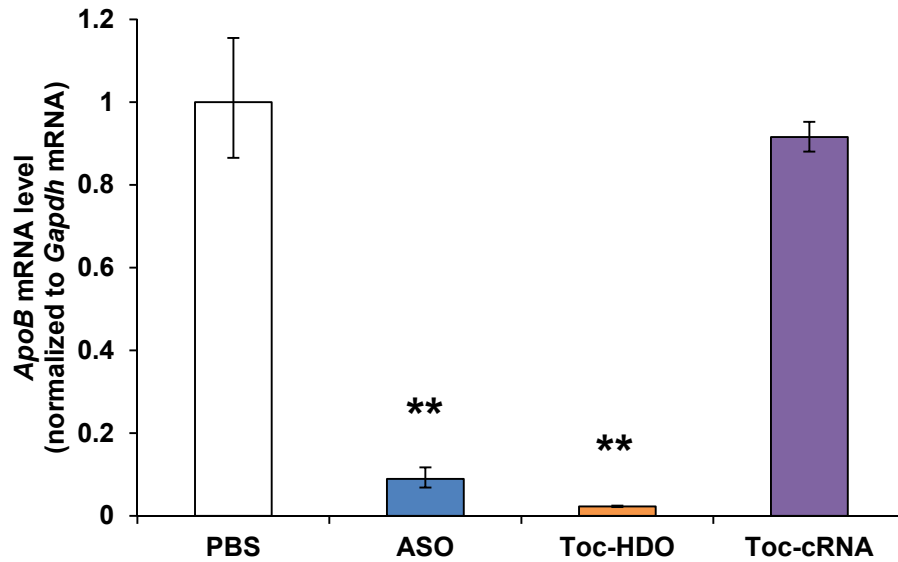

**Supplementary Figure 2.  $\alpha$ -tocopherol–conjugated complementary RNA does not have a silencing effect.**

qRT-PCR analyses showing *ApoB* mRNA levels in liver assayed 3 d after injection of 6 mg/kg ASO,  $\alpha$ -tocopherol–conjugated DNA/RNA heteroduplex oligonucleotide (Toc-HDO),  $\alpha$ -tocopherol–conjugated cRNA (Toc-cRNA), or PBS alone. Data are expressed as mean values  $\pm$  s.e.m. ( $n = 3$ , \*\*  $P < 0.01$  versus PBS). Data are representative of at least three independent experiments each.  $P$  values were calculated from Student’s two-tailed  $t$ -test.

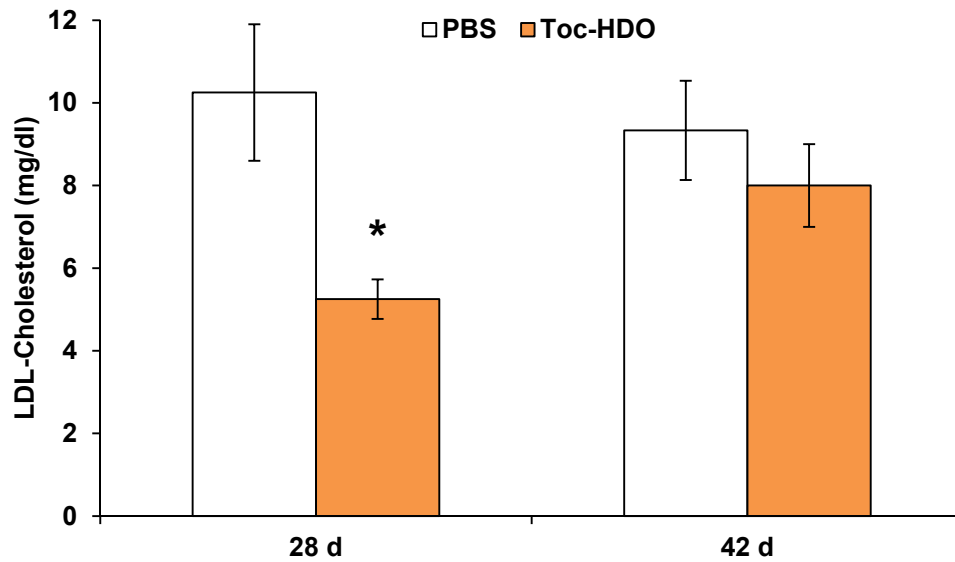

**Supplementary Figure 3. Duration of serum LDL-cholesterol reduction after *ApoB* mRNA silencing by Toc-HDO targeting *ApoB* gene.**

LDL-cholesterol levels in serum from 0.75 mg/kg Toc-HDO injected mice at indicated time points. Data are expressed as mean values  $\pm$  s.e.m. ( $n = 4$  at 28 d, 3 at 42 d, \*  $P < 0.05$  versus PBS). Data are representative of at least three independent experiments each.  $P$  values were calculated from Student's two-tailed  $t$ -test.

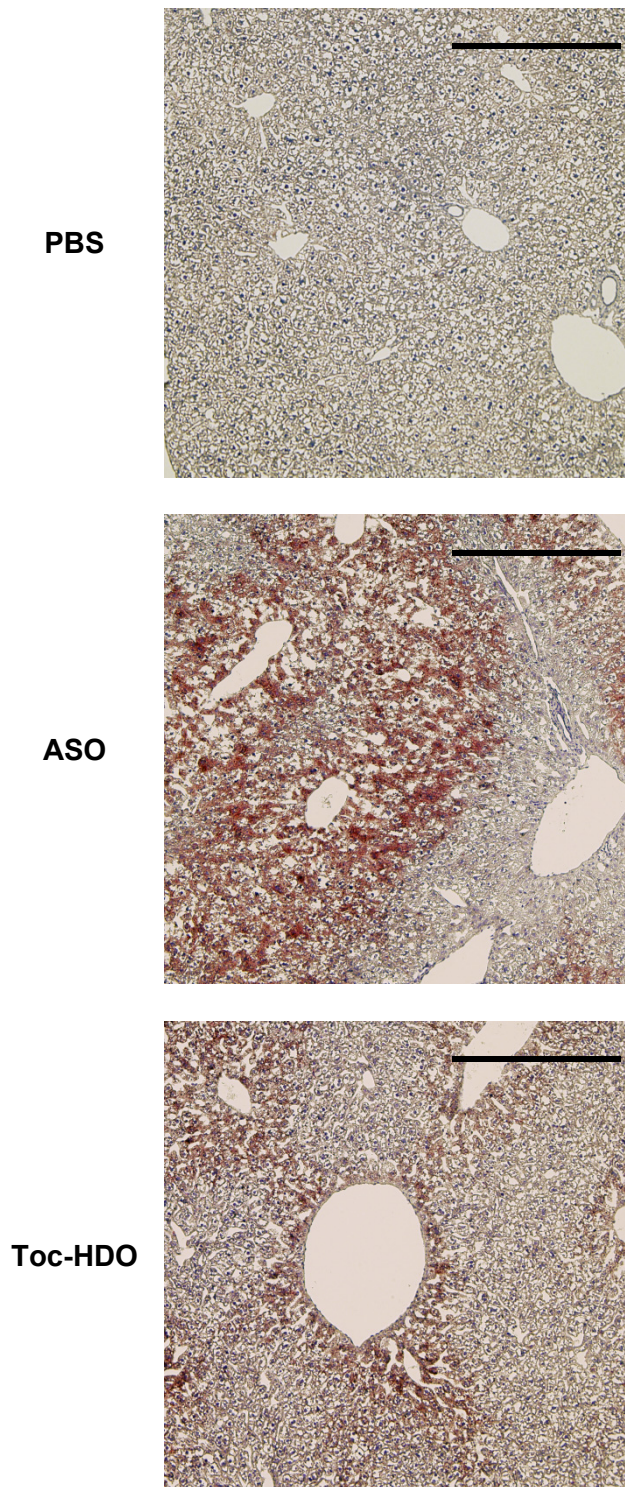

**Supplementary Figure 4. Histological analysis for accumulation of hepatic lipid droplet.**

The hepatic steatosis observed in 0.04 mg/kg Toc-HDO injected mice (*ApoB* reduction rate; 0.39) was not more than that of 0.75 mg/kg ASO injected mice (*ApoB* reduction rate; 0.41). Oil Red O staining of liver 3 d after injection of 0.75 mg/kg ASO, 0.04 mg/kg Toc-HDO, or PBS alone. Bar = 50 μm.

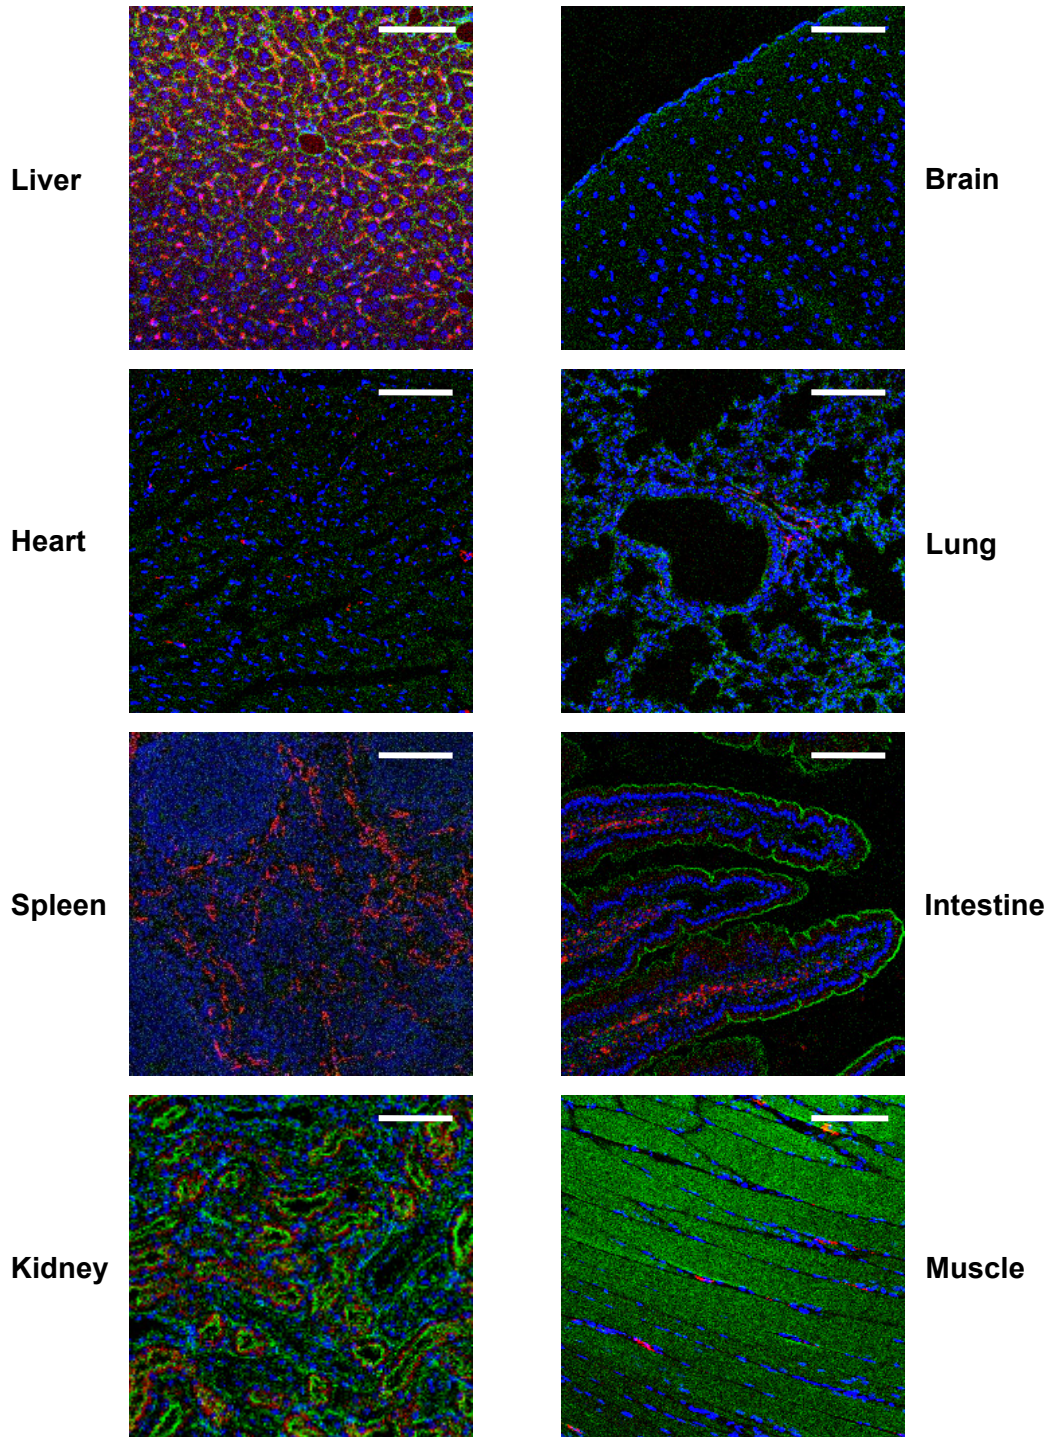

**Supplementary Figure 5. Biodistribution of Toc-HDO.**

Fluorescence micrographs of various mice organs 6 h after injection of 0.75 mg/kg Cy3-labeled Toc-HDO. Red: Cy3-labeled DNA/LNA gapmer; Green: AlexaFluor 488

Phalloidin; Blue: Hoechst 33342; Bar = 100  $\mu$ m.

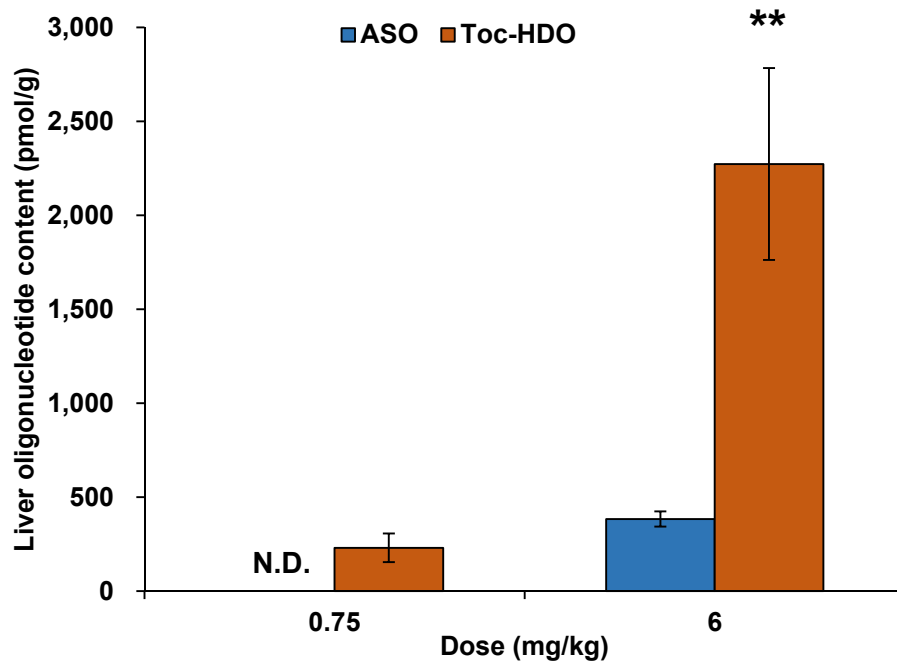

**Supplementary Figure 6. ELISA analyses of DNA/LNA gapmer in liver.**

The content of DNA/LNA gapmer in liver of mice after injection of 0.75 or 6 mg/kg of ASO or Toc-HDO was measured by enzyme-linked immunosorbent assay (ELISA). Data are expressed as mean values  $\pm$  s.e.m ( $n = 3$ , \*\*  $P < 0.01$  versus ASO). Data are representative of at least three independent experiments each.  $P$  values were calculated from Student's two-tailed  $t$ -test. N.D., not detected.

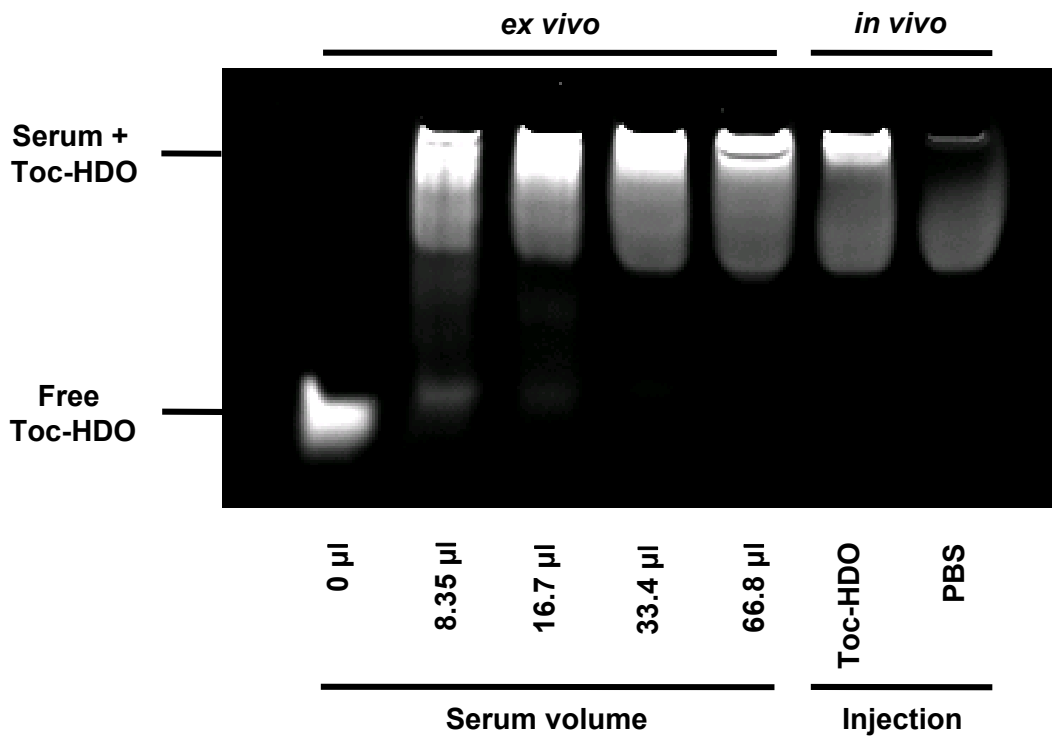

**Supplementary Figure 7. Gel-shift assay of Toc-HDO with mouse serum.**

For *ex vivo* samples, Toc-HDO (100 pmol) was incubated with different volumes of the mouse serum. For *in vivo* samples, serum was collected from mouse 5 min after injection of 0.75 mg/kg Toc-HDO or PBS only. The electrophoretic mobility of free Toc-HDO was examined by using a 15% polyacrylamide gel.

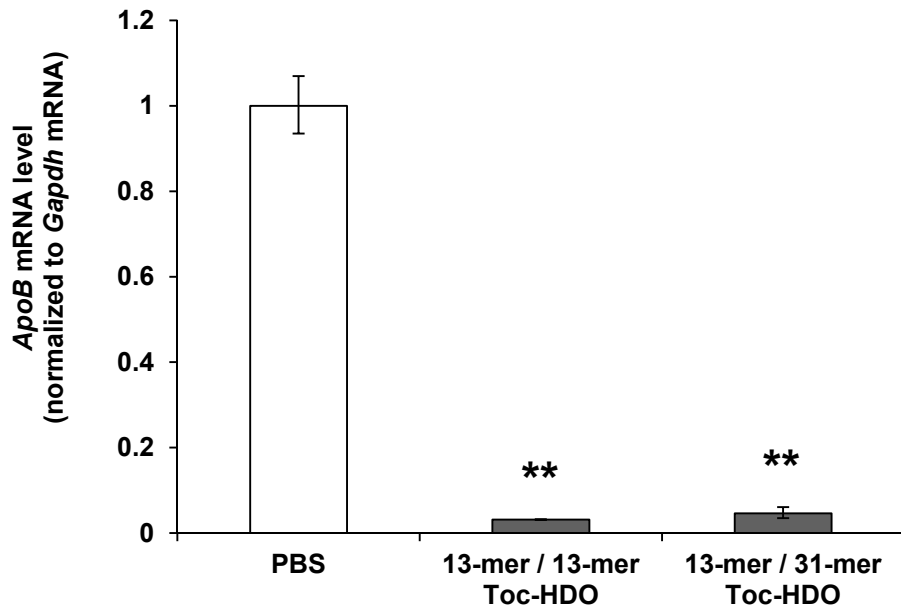

**Supplementary Figure 8. The efficacy of Toc-HDO which had long Toc-cRNA.**

qRT-PCR analyses of *ApoB* mRNA levels in liver 3 d after injection of 0.75 mg/kg Toc-HDO. Toc-HDO of 13-mer DNA/31-mer cRNA was similarly potent as that of 13-mer DNA/13-mer cRNA. Data are expressed as mean values  $\pm$  s.e.m. ( $n = 3$ , \*\*  $P < 0.01$  versus PBS). Data are representative of at least three independent experiments each.  $P$  values were calculated from Student's two-tailed  $t$ -test.



## Supplementary Tables

### Supplementary Table 1. The melting temperature ( $T_m$ ) of HDO and Toc-HDO targeting mouse

#### *Apolipoprotein B (ApoB) mRNA.*

| $T_m$ (°C)               | 12-mer | 13-mer | 14-mer |
|--------------------------|--------|--------|--------|
| HDO                      | 47     | 57     | 61     |
| Toc-HDO                  | 47     | 54     | 59     |
| Toc-HDO with 2'-OMe cRNA |        | 53     |        |

**Supplementary Table 2. Hematology and blood chemistry analyses of mice after repeated intravenous injection of 1 mg/kg ASO, Toc-HDO, or PBS alone for 4 consecutive days.**

|                                                 | PBS               | ASO               | Toc-HDO                                     |
|-------------------------------------------------|-------------------|-------------------|---------------------------------------------|
| <b>Hematology</b>                               |                   |                   |                                             |
| Red blood cells ( $\times 10^6/\mu\text{l}$ )   | 9.57 $\pm$ 0.27   | 9.69 $\pm$ 0.30   | 9.82 $\pm$ 0.23                             |
| Hemoglobin (g/dl)                               | 14.2 $\pm$ 0.7    | 14.5 $\pm$ 0.4    | 14.7 $\pm$ 0.2                              |
| Hematocrit (%)                                  | 52.7 $\pm$ 3.0    | 54.1 $\pm$ 1.2    | 55.5 $\pm$ 0.6                              |
| White blood cells ( $\times 10^3/\mu\text{l}$ ) | 6.55 $\pm$ 0.71   | 5.91 $\pm$ 0.40   | 6.15 $\pm$ 0.30                             |
| Platelets ( $\times 10^3/\mu\text{l}$ )         | 1235 $\pm$ 80     | 1151 $\pm$ 65     | 1196 $\pm$ 68                               |
| <b>Blood Chemistry</b>                          |                   |                   |                                             |
| Aspartate aminotransferase (IU/l)               | 62 $\pm$ 8        | 56 $\pm$ 7        | 82 $\pm$ 12                                 |
| Alanine aminotransferase (IU/l)                 | 26 $\pm$ 2        | 30 $\pm$ 3        | 53 $\pm$ 5 <sup>**</sup> , <sup>##</sup>    |
| Total bilirubin (mg/dl)                         | 0.040 $\pm$ 0.003 | 0.050 $\pm$ 0.009 | 0.041 $\pm$ 0.005                           |
| Alkaline phosphatase (IU/l)                     | 812 $\pm$ 11      | 832 $\pm$ 21      | 1335 $\pm$ 44 <sup>**</sup> , <sup>##</sup> |
| Lactase dehydrogenase (IU/l)                    | 318 $\pm$ 30      | 321 $\pm$ 26      | 360 $\pm$ 31                                |
| Cholinesterase (IU/l)                           | 23 $\pm$ 1        | 25 $\pm$ 1        | 25 $\pm$ 1                                  |
| Urea nitrogen (mg/dl)                           | 36.0 $\pm$ 1.2    | 35.1 $\pm$ 1.5    | 32.7 $\pm$ 1.1                              |
| Creatinine (mg/dl)                              | 0.129 $\pm$ 0.001 | 0.140 $\pm$ 0.010 | 0.130 $\pm$ 0.010                           |
| Creatine kinase (IU/l)                          | 261 $\pm$ 84      | 227 $\pm$ 65      | 308 $\pm$ 99                                |
| Glucose (mg/dl)                                 | 175 $\pm$ 10      | 171 $\pm$ 4       | 174 $\pm$ 4                                 |
| Total protein (g/dl)                            | 4.79 $\pm$ 0.08   | 4.90 $\pm$ 0.10   | 4.70 $\pm$ 0.10                             |
| Albumin (g/dl)                                  | 3.35 $\pm$ 0.04   | 3.44 $\pm$ 0.06   | 3.31 $\pm$ 0.06                             |

Values represent mean  $\pm$  s.e.m. ( $n = 9$ ). <sup>##</sup>  $P < 0.01$  versus ASO, <sup>\*\*</sup>  $P < 0.01$  versus PBS (Tukey's test).

**Supplementary Table 3. Histological findings in mice after repeated intravenous injection of 1 mg/kg**

**ASO or Toc-HDO for 4 consecutive days.**

| Organ                 | Findings                                          | PBS |    |    | ASO |    |    | Toc-HDO |    |    |
|-----------------------|---------------------------------------------------|-----|----|----|-----|----|----|---------|----|----|
|                       |                                                   | +1  | +2 | +3 | +1  | +2 | +3 | +1      | +2 | +3 |
| heart                 | necrosis (myocardium)                             | 0   | 0  | 0  | 0   | 0  | 0  | 0       | 0  | 0  |
|                       | hemorrhage (myocardium)                           | 0   | 0  | 0  | 0   | 0  | 0  | 0       | 0  | 0  |
| liver                 | necrosis (hepatocytes)                            | 0   | 0  | 0  | 0   | 0  | 0  | 0       | 0  | 0  |
| kidney                | cell death<br>(proximal renal tubular epithelium) | 0   | 0  | 0  | 0   | 0  | 0  | 0       | 0  | 0  |
| adrenal gland         | cell death (cortex)                               | 0   | 0  | 0  | 0   | 0  | 0  | 0       | 0  | 0  |
| spleen                | increased neutrophils (red pulp)                  | 0   | 0  | 0  | 0   | 0  | 0  | 0       | 0  | 0  |
|                       | hypertrophy (histiocytes, marginal zone)          | 0   | 0  | 0  | 0   | 0  | 0  | 0       | 0  | 0  |
|                       | cell death (red pulp)                             | 0   | 0  | 0  | 0   | 0  | 0  | 0       | 0  | 0  |
| mesenteric lymph node | hypertrophy (histiocytes, marginal zone)          | 0   | 0  | 0  | 0   | 0  | 0  | 0       | 0  | 0  |
| bone marrow, femur    | increased megakaryocytes                          | 0   | 0  | 0  | 0   | 0  | 0  | 0       | 0  | 0  |
| testis                | cell infiltration (neutrophils, interstitium)     | 0   | 0  | 0  | 0   | 0  | 0  | 0       | 0  | 0  |
| stomach               | cell infiltration (neutrophils, submucosa)        | 0   | 0  | 0  | 0   | 0  | 0  | 0       | 0  | 0  |

*n* = 4, +1: slight; +2: moderate; +3: marked.

**Supplementary Table 4. Serum aspartate aminotransferase (AST), alanine aminotransferase (ALT), urea nitrogen (UN) and creatinine (Cre) levels of non-human primates after single intravenous injection of 2 or 8 mg/kg ASO, Toc-HDO, or saline alone.**

|             |        | Saline      | ASO         |             | Toc-HDO     |             |
|-------------|--------|-------------|-------------|-------------|-------------|-------------|
|             |        |             | 2 mg/kg     | 8 mg/kg     | 2 mg/kg     | 8 mg/kg     |
| AST (IU/l)  | Pre    | 45 ± 6      | 31 ± 4      | 41 ± 6      | 36 ± 4      | 46 ± 4      |
|             | day 3  | 28 ± 6      | 38 ± 8      | 33 ± 4      | 38 ± 11     | 65 ± 13     |
|             | day 7  | 35 ± 3      | 38 ± 4      | 39 ± 5      | 46 ± 7      | 54 ± 7      |
|             | day 14 | 53 ± 6      | 46 ± 2*     | 48 ± 8      | 31 ± 6      | 72 ± 8*     |
|             | day 21 | 36 ± 4      | 43 ± 7      | 40 ± 4      | 41 ± 4      | 57 ± 7      |
| ALT (IU/l)  | Pre    | 38 ± 14     | 35 ± 7      | 43 ± 16     | 25 ± 7      | 57 ± 18     |
|             | day 3  | 34 ± 15     | 37 ± 7      | 36 ± 12     | 25 ± 5      | 75 ± 11     |
|             | day 7  | 32 ± 12     | 35 ± 6      | 42 ± 15     | 34 ± 3      | 69 ± 14     |
|             | day 14 | 28 ± 6      | 35 ± 6      | 39 ± 12     | 26 ± 1      | 82 ± 27     |
|             | day 21 | 25 ± 7      | 33 ± 9      | 40 ± 12     | 25 ± 4      | 94 ± 33     |
| UN (mg/dl)  | Pre    | 18.0 ± 4.2  | 15.8 ± 2.3  | 18.6 ± 2.5  | 14.0 ± 1.0  | 13.3 ± 0.8  |
|             | day 3  | 17.9 ± 0.9  | 17.7 ± 3.6  | 17.9 ± 1.7  | 16.5 ± 1.0  | 17.2 ± 2.8  |
|             | day 7  | 16.1 ± 1.5  | 17.8 ± 1.0  | 17.4 ± 2.1  | 15.1 ± 1.6  | 12.7 ± 0.6  |
|             | day 14 | 15.6 ± 0.5  | 16.4 ± 1.5  | 17.7 ± 0.5  | 15.0 ± 1.1  | 14.5 ± 1.8  |
|             | day 21 | 13.1 ± 1.1  | 16.6 ± 1.3  | 16.4 ± 2.5  | 14.6 ± 1.1  | 14.7 ± 1.2  |
| Cre (mg/dl) | Pre    | 0.60 ± 0.03 | 0.60 ± 0.00 | 0.50 ± 0.03 | 0.60 ± 0.03 | 0.60 ± 0.06 |
|             | day 3  | 0.60 ± 0.10 | 0.60 ± 0.07 | 0.50 ± 0.00 | 0.50 ± 0.03 | 0.60 ± 0.07 |
|             | day 7  | 0.60 ± 0.03 | 0.60 ± 0.03 | 0.50 ± 0.06 | 0.60 ± 0.10 | 0.60 ± 0.06 |
|             | day 14 | 0.50 ± 0.03 | 0.60 ± 0.00 | 0.50 ± 0.07 | 0.50 ± 0.03 | 0.60 ± 0.03 |
|             | day 21 | 0.60 ± 0.00 | 0.60 ± 0.03 | 0.50 ± 0.00 | 0.50 ± 0.03 | 0.60 ± 0.03 |

Values represent mean ± s.e.m. ( $n = 3$ ). \*  $P < 0.05$  versus Pre (Student's  $t$ -test).
